# Supplementary material for: Content Validity Index and Intra- and Inter-Rater Reliability of a New Muscle Strength/Endurance Test Battery for Swedish Soldiers
Source: PubMed Central journal article supplement (PMC4503674; doi:10.1371/journal.pone.0132185), 2015-07-15
Supplement: pone.0132185.s002.pdf [file pone.0132185.s002.pdf]

## Results Content Validity Index

| Test                                   | n experts (9) in agreement | CVI <sup>a)</sup> | Pc <sup>b)</sup> | K <sup>*c)</sup> | Evaluation <sup>d)</sup> |
|----------------------------------------|----------------------------|-------------------|------------------|------------------|--------------------------|
| <b>Push-ups</b>                        |                            |                   |                  |                  |                          |
| Carrying equipment                     | 3                          | 0.333             | 0.164            | 0.202            |                          |
| Carrying hold                          | 4                          | 0.444             | 0.246            | 0.263            | Fair                     |
| Lifting                                | 5                          | 0.556             | 0.246            | 0.410            | Fair                     |
| Digging                                | 4                          | 0.444             | 0.246            | 0.263            | Fair                     |
| Climbing                               | 4                          | 0.444             | 0.246            | 0.263            | Fair                     |
| <b>Sit-ups, crook lying</b>            |                            |                   |                  |                  |                          |
| Carrying equipment                     | 1                          | 0.111             | 0.018            | 0.095            |                          |
| Carrying hold                          | 1                          | 0.111             | 0.018            | 0.095            |                          |
| Lifting                                | 2                          | 0.222             | 0.070            | 0.163            |                          |
| Digging                                | 4                          | 0.444             | 0.246            | 0.263            | Fair                     |
| Climbing                               | 4                          | 0.444             | 0.246            | 0.263            | Fair                     |
| <b>Sit-ups, fixed feet</b>             |                            |                   |                  |                  |                          |
| Carrying equipment                     | 1                          | 0.111             | 0.018            | 0.095            |                          |
| Carrying hold                          | 1                          | 0.111             | 0.018            | 0.095            |                          |
| Lifting                                | 1                          | 0.111             | 0.018            | 0.095            |                          |
| Digging                                | 1                          | 0.111             | 0.018            | 0.095            |                          |
| Climbing                               | 3                          | 0.333             | 0.164            | 0.202            |                          |
| <b>Sit-ups, feet on bench</b>          |                            |                   |                  |                  |                          |
| Carrying equipment                     | 1                          | 0.111             | 0.018            | 0.095            |                          |
| Carrying hold                          | 1                          | 0.111             | 0.018            | 0.095            |                          |
| Lifting                                | 2                          | 0.222             | 0.070            | 0.163            |                          |
| Digging                                | 3                          | 0.333             | 0.164            | 0.202            |                          |
| Climbing                               | 3                          | 0.333             | 0.164            | 0.202            |                          |
| <b>Side-bridge</b>                     |                            |                   |                  |                  |                          |
| Carrying equipment                     | 6                          | 0.667             | 0.164            | 0.601            | Good                     |
| Carrying hold                          | 5                          | 0.556             | 0.246            | 0.410            | Fair                     |
| Lifting                                | 7                          | 0.780             | 0.070            | 0.760            | Excellent                |
| Digging                                | 6                          | 0.667             | 0.164            | 0.601            | Good                     |
| Climbing                               | 5                          | 0.556             | 0.246            | 0.410            | Fair                     |
| <b>Plank with 0 kg to 20 kg weight</b> |                            |                   |                  |                  |                          |
| Carrying equipment                     | 7                          | 0.780             | 0.070            | 0.760            | Excellent                |
| Carrying hold                          | 6                          | 0.667             | 0.164            | 0.601            | Good                     |
| Lifting                                | 6                          | 0.667             | 0.164            | 0.601            | Good                     |
| Digging                                | 6                          | 0.667             | 0.164            | 0.601            | Good                     |
| Climbing                               | 4                          | 0.444             | 0.246            | 0.263            | Fair                     |

| Test                                               | n experts (9) in agreement | CVI <sup>a)</sup> | Pc <sup>b)</sup> | K <sup>*</sup> c) | Evaluation <sup>d)</sup> |
|----------------------------------------------------|----------------------------|-------------------|------------------|-------------------|--------------------------|
| <b>Back extension</b>                              |                            |                   |                  |                   |                          |
| Carrying equipment                                 | 7                          | 0.778             | 0.070            | 0.760             | Excellent                |
| Carrying hold                                      | 7                          | 0.778             | 0.070            | 0.760             | Excellent                |
| Lifting                                            | 7                          | 0.778             | 0.070            | 0.760             | Excellent                |
| Digging                                            | 7                          | 0.778             | 0.070            | 0.760             | Excellent                |
| Climbing                                           | 2                          | 0.222             | 0.070            | 0.163             |                          |
| <b>Pull-ups</b>                                    |                            |                   |                  |                   |                          |
| Carrying equipment                                 | 1                          | 0.111             | 0.018            | 0.095             |                          |
| Carrying hold                                      | 4                          | 0.444             | 0.246            | 0.263             | Fair                     |
| Lifting                                            | 7                          | 0.778             | 0.070            | 0.760             | Excellent                |
| Digging                                            | 6                          | 0.667             | 0.164            | 0.601             | Good                     |
| Climbing                                           | 7                          | 0.778             | 0.070            | 0.760             | Excellent                |
| <b>Chins</b>                                       |                            |                   |                  |                   |                          |
| Carrying equipment                                 | 2                          | 0.222             | 0.070            | 0.163             |                          |
| Carrying hold                                      | 3                          | 0.333             | 0.164            | 0.202             |                          |
| Lifting                                            | 7                          | 0.778             | 0.070            | 0.760             | Excellent                |
| Digging                                            | 4                          | 0.444             | 0.246            | 0.263             | Fair                     |
| Climbing                                           | 8                          | 0.889             | 0.014            | 0.890             | Excellent                |
| <b>Inclined chins</b>                              |                            |                   |                  |                   |                          |
| Carrying equipment                                 | 2                          | 0.222             | 0.070            | 0.163             |                          |
| Carrying hold                                      | 2                          | 0.222             | 0.070            | 0.163             |                          |
| Lifting                                            | 6                          | 0.667             | 0.164            | 0.601             | Good                     |
| Digging                                            | 4                          | 0.444             | 0.246            | 0.263             | Fair                     |
| Climbing                                           | 7                          | 0.778             | 0.070            | 0.760             | Excellent                |
| <b>Dips</b>                                        |                            |                   |                  |                   |                          |
| Carrying equipment                                 | 0                          |                   |                  |                   |                          |
| Carrying hold                                      | 0                          |                   |                  |                   |                          |
| Lifting                                            | 2                          | 0.222             | 0.070            | 0.163             |                          |
| Digging                                            | 4                          | 0.444             | 0.246            | 0.263             | Fair                     |
| Climbing                                           | 4                          | 0.444             | 0.246            | 0.263             | Fair                     |
| <b>Lunges with 10 kg to 50 kg on the shoulders</b> |                            |                   |                  |                   |                          |
| Carrying equipment                                 | 8                          | 0.889             | 0.014            | 0.890             | Excellent                |
| Carrying hold                                      | 7                          | 0.778             | 0.070            | 0.760             | Excellent                |
| Lifting                                            | 8                          | 0.889             | 0.014            | 0.890             | Excellent                |
| Digging                                            | 5                          | 0.556             | 0.246            | 0.410             | Fair                     |
| Climbing                                           | 6                          | 0.667             | 0.164            | 0.601             | Good                     |
|                                                    |                            |                   |                  |                   |                          |
|                                                    |                            |                   |                  |                   |                          |
|                                                    |                            |                   |                  |                   |                          |

| Test                              | n experts (9) in agreement | CVI <sup>a)</sup> | P <sub>c</sub> <sup>b)</sup> | K <sub>*c)</sub> | Evaluation <sup>d)</sup> |
|-----------------------------------|----------------------------|-------------------|------------------------------|------------------|--------------------------|
| <b>Vertical jump</b>              |                            |                   |                              |                  |                          |
| Carrying equipment                | 2                          | 0.222             | 0.070                        | 0.163            |                          |
| Carrying hold                     | 1                          | 0.111             | 0.018                        | 0.095            |                          |
| Lifting                           | 5                          | 0.556             | 0.246                        | 0.410            | Fair                     |
| Digging                           | 2                          | 0.222             | 0.070                        | 0.163            |                          |
| Climbing                          | 3                          | 0.333             | 0.164                        | 0.202            |                          |
| <b>Horizontal jump</b>            |                            |                   |                              |                  |                          |
| Carrying equipment                | 2                          | 0.222             | 0.070                        | 0.163            |                          |
| Carrying hold                     | 1                          | 0.111             | 0.018                        | 0.095            |                          |
| Lifting                           | 2                          | 0.222             | 0.070                        | 0.163            |                          |
| Digging                           | 1                          | 0.111             | 0.018                        | 0.095            |                          |
| Climbing                          | 1                          | 0.111             | 0.018                        | 0.095            |                          |
| <b>Ranger test</b>                |                            |                   |                              |                  |                          |
| Carrying equipment                | 9                          | 1.0               | 0.002                        | 1.0              | Excellent                |
| Carrying hold                     | 8                          | 0.889             | 0.014                        | 0.890            | Excellent                |
| Lifting                           | 8                          | 0.889             | 0.014                        | 0.890            | Excellent                |
| Digging                           | 6                          | 0.667             | 0.164                        | 0.601            | Good                     |
| Climbing                          | 8                          | 0.889             | 0.014                        | 0.890            | Excellent                |
| <b>Dead-lift with barbell</b>     |                            |                   |                              |                  |                          |
| Carrying equipment                | 6                          | 0.667             | 0.164                        | 0.601            | Good                     |
| Carrying hold                     | 8                          | 0.889             | 0.014                        | 0.890            | Excellent                |
| Lifting                           | 9                          | 1.0               | 0.002                        | 1.0              | Excellent                |
| Digging                           | 8                          | 0.889             | 0.014                        | 0.890            | Excellent                |
| Climbing                          | 5                          | 0.556             | 0.246                        | 0.410            | Fair                     |
| <b>Dead-lift with kettlebells</b> |                            |                   |                              |                  |                          |
| Carrying equipment                | 7                          | 0.778             | 0.070                        | 0.760            | Excellent                |
| Carrying hold                     | 8                          | 0.889             | 0.014                        | 0.890            | Excellent                |
| Lifting                           | 9                          | 1.0               | 0.002                        | 1.0              | Excellent                |
| Digging                           | 8                          | 0.889             | 0.014                        | 0.890            | Excellent                |
| Climbing                          | 6                          | 0.667             | 0.164                        | 0.601            | Good                     |
| <b>Isokai test</b>                |                            |                   |                              |                  |                          |
| Carrying equipment                | 6                          | 0.667             | 0.164                        | 0.601            | Good                     |
| Carrying hold                     | 8                          | 0.889             | 0.014                        | 0.890            | Excellent                |
| Lifting                           | 9                          | 1.0               | 0.002                        | 1.0              | Excellent                |
| Digging                           | 8                          | 0.889             | 0.014                        | 0.890            | Excellent                |
| Climbing                          | 6                          | 0.667             | 0.164                        | 0.601            | Good                     |

| Test                          | n experts (9) in agreement | CVI <sup>a)</sup> | P <sub>c</sub> <sup>b)</sup> | K <sub>*c)</sub> | Evaluation <sup>d)</sup> |
|-------------------------------|----------------------------|-------------------|------------------------------|------------------|--------------------------|
| <b>Incremental lift</b>       |                            |                   |                              |                  |                          |
| Carrying equipment            | 4                          | 0.444             | 0.246                        | 0.263            | Fair                     |
| Carrying hold                 | 8                          | 0.889             | 0.014                        | 0.890            | Excellent                |
| Lifting                       | 9                          | 1.0               | 0.002                        | 1.0              | Excellent                |
| Digging                       | 6                          | 0.667             | 0.164                        | 0.601            | Good                     |
| Climbing                      | 3                          | 0.333             | 0.164                        | 0.202            |                          |
| <b>Box lift</b>               |                            |                   |                              |                  |                          |
| Carrying equipment            | 3                          | 0.333             | 0.164                        | 0.202            |                          |
| Carrying hold                 | 7                          | 0.780             | 0.070                        | 0.760            | Excellent                |
| Lifting                       | 9                          | 1.0               | 0.002                        | 1.0              | Excellent                |
| Digging                       | 5                          | 0.556             | 0.246                        | 0.410            | Fair                     |
| Climbing                      | 3                          | 0.333             | 0.164                        | 0.202            |                          |
| <b>Handgrip</b>               |                            |                   |                              |                  |                          |
| Carrying equipment            | 0                          |                   |                              |                  |                          |
| Carrying hold                 | 7                          | 0.778             | 0.070                        | 0.760            | Excellent                |
| Lifting                       | 7                          | 0.778             | 0.070                        | 0.760            | Excellent                |
| Digging                       | 6                          | 0.667             | 0.164                        | 0.601            | Good                     |
| Climbing                      | 6                          | 0.667             | 0.164                        | 0.601            | Good                     |
| <b>Leg press, isometric</b>   |                            |                   |                              |                  |                          |
| Carrying equipment            | 3                          | 0.333             | 0.164                        | 0.202            |                          |
| Carrying hold                 | 3                          | 0.333             | 0.164                        | 0.202            |                          |
| Lifting                       | 5                          | 0.556             | 0.246                        | 0.410            | Fair                     |
| Digging                       | 3                          | 0.333             | 0.164                        | 0.202            |                          |
| Climbing                      | 3                          | 0.333             | 0.164                        | 0.202            |                          |
| <b>Leg press, dynamic</b>     |                            |                   |                              |                  |                          |
| Carrying equipment            | 5                          | 0.556             | 0.246                        | 0.410            | Fair                     |
| Carrying hold                 | 6                          | 0.667             | 0.164                        | 0.601            | Good                     |
| Lifting                       | 9                          | 1.0               | 0.002                        | 1.0              | Excellent                |
| Digging                       | 6                          | 0.667             | 0.164                        | 0.601            | Good                     |
| Climbing                      | 6                          | 0.667             | 0.164                        | 0.601            | Good                     |
| <b>Chest press, isometric</b> |                            |                   |                              |                  |                          |
| Carrying equipment            | 1                          | 0.111             | 0.018                        | 0.095            |                          |
| Carrying hold                 | 1                          | 0.111             | 0.018                        | 0.095            |                          |
| Lifting                       | 1                          | 0.111             | 0.018                        | 0.095            |                          |
| Digging                       | 1                          | 0.111             | 0.018                        | 0.095            |                          |
| Climbing                      | 1                          | 0.111             | 0.018                        | 0.095            |                          |

| Test                        | n experts (9) in agreement | CVI <sup>a)</sup> | Pc <sup>b)</sup> | K <sup>*c)</sup> | Evaluation <sup>d)</sup> |
|-----------------------------|----------------------------|-------------------|------------------|------------------|--------------------------|
| <b>Chest press, dynamic</b> |                            |                   |                  |                  |                          |
| Carrying equipment          | 1                          | 0.111             | 0.018            | 0.095            |                          |
| Carrying hold               | 1                          | 0.111             | 0.018            | 0.095            |                          |
| Lifting                     | 3                          | 0.333             | 0.164            | 0.202            |                          |
| Digging                     | 3                          | 0.333             | 0.164            | 0.202            |                          |
| Climbing                    | 1                          | 0.111             | 0.018            | 0.095            |                          |
| <b>Elbow-flex</b>           |                            |                   |                  |                  |                          |
| Carrying equipment          | 0                          |                   |                  |                  |                          |
| Carrying hold               | 6                          | 0.667             | 0.164            | 0.601            | Good                     |
| Lifting                     | 3                          | 0.333             | 0.164            | 0.202            |                          |
| Digging                     | 3                          | 0.333             | 0.164            | 0.202            |                          |
| Climbing                    | 1                          | 0.111             | 0.018            | 0.095            |                          |
| <b>Bent arm hang</b>        |                            |                   |                  |                  |                          |
| Carrying equipment          | 1                          | 0.111             | 0.018            | 0.095            |                          |
| Carrying hold               | 5                          | 0.556             | 0.246            | 0.410            | Fair                     |
| Lifting                     | 2                          | 0.222             | 0.070            | 0.163            |                          |
| Digging                     | 2                          | 0.222             | 0.070            | 0.163            |                          |
| Climbing                    | 5                          | 0.556             | 0.246            | 0.410            | Fair                     |
| <b>Bench press</b>          |                            |                   |                  |                  |                          |
| Carrying equipment          | 1                          | 0.111             | 0.018            | 0.095            |                          |
| Carrying hold               | 1                          | 0.111             | 0.018            | 0.095            |                          |
| Lifting                     | 3                          | 0.333             | 0.164            | 0.202            |                          |
| Digging                     | 2                          | 0.222             | 0.070            | 0.163            |                          |
| Climbing                    | 1                          | 0.111             | 0.018            | 0.095            |                          |
| <b>Shoulder press</b>       |                            |                   |                  |                  |                          |
| Carrying equipment          | 1                          | 0.111             | 0.018            | 0.095            |                          |
| Carrying hold               | 2                          | 0.222             | 0.070            | 0.163            |                          |
| Lifting                     | 5                          | 0.556             | 0.246            | 0.410            | Fair                     |
| Digging                     | 3                          | 0.333             | 0.164            | 0.202            |                          |
| Climbing                    | 2                          | 0.222             | 0.070            | 0.163            |                          |
| <b>Loaded squat</b>         |                            |                   |                  |                  |                          |
| Carrying equipment          | 6                          | 0.667             | 0.164            | 0.601            | Good                     |
| Carrying hold               | 6                          | 0.667             | 0.164            | 0.601            | Good                     |
| Lifting                     | 9                          | 1.0               | 0.002            | 1.0              | Excellent                |
| Digging                     | 6                          | 0.667             | 0.164            | 0.601            | Good                     |
| Climbing                    | 8                          | 0.889             | 0.014            | 0.890            | Excellent                |

a) CVI, content validity index.

b) pc (probability of a chance occurrence) was computed using the formula for a binomial random variable, with one specific outcome:  $pc = [N!/A!(N-A)!] \cdot .5^N$  where N = number of experts and A = Number agreeing on good relevance.

c)  $k^* = \text{kappa}$  designating agreement on relevance:  $k^* = (\text{CVI} - \text{pc}) / (1 - \text{pc})$ .

d) Evaluation criteria for kappa, using guidelines described in Cicchetti and Sparrow (1981) and Fleiss (1981): Fair = k of .40 to .59; Good = k of .60 to .74; and Excellent = k > .74.
